# Supplementary material
Source: Springer Nature journal article supplement (https://www.springermedizin.de/resource/supplementary/12874_2012_982_MOESM1_ESM.pdf/9432988)
Supplement: MOESM1 [file 9432988]

Assessed for eligibility  
n = 178 (feasibility)  
n = 335 (pilot)  
Total = 513

- Excluded (n = 434)
- Observational  
n = 46 (feasibility)  
n = 129 (pilot)
  - Closed  
n = 88 (feasibility)  
n = 132 (pilot)
  - Non-randomised  
n = 8 (feasibility)  
n = 12 (pilot)
  - Duplicates  
n = 4
  - Surveys  
n = 2 (pilot)
  - Cluster trials  
n = 1 (pilot)  
n = 7 (feasibility)

Eligible (n = 84)

- No data available  
n = 1 (feasibility)  
n = 4 (pilot)

Analysed  
n = 25 (feasibility)  
n = 50 (pilot)  
n = 4 (pilot + feasibility)  
Total = 79
